# Supplementary material for: One-step synthesis of flower-shaped WO3 nanostructures for a high-sensitivity room-temperature NOx gas sensor
Source: Royal Society of Chemistry journal article supplement (doi:10.1039/c6ra21322g), 2016-01-01
Supplement: c6ra21322g1.pdf [file c6ra21322g1.pdf]

# One Step Synthesis of Flower-like WO<sub>3</sub> Nanostructures for High Sensitivity Room Temperature NO<sub>x</sub> Gas Sensor

Wencheng Fang<sup>a</sup>, Ying Yang<sup>a,b\*</sup>, Hui Yu<sup>a</sup>, Xiangting Dong<sup>a\*</sup>, Tingting Wang<sup>a</sup>, Jinxian Wang<sup>a</sup>,  
Zhelin Liu<sup>a</sup>, Bo Zhao<sup>a</sup> and Ming Yang<sup>a</sup>

<sup>a</sup> Key Laboratory of Applied Chemistry and Nanotechnology at Changchun University of Science and Technology, Changchun, 130022, P. R. China. E-mail: yangying0807@126.com (Ying Yang); dongxiangting888@163.com (Xiangting Dong); Fax: 86 0431 85383815; Tel: 86 0431 85582574;

<sup>b</sup> Key Laboratory of Functional Inorganic Material Chemistry (Heilongjiang University), Ministry of Education, Harbin150080, P. R. China.

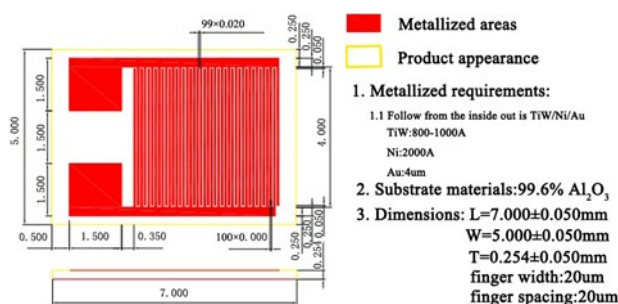

Fig. S1 The image of interdigitated gold electrode and its parameters.

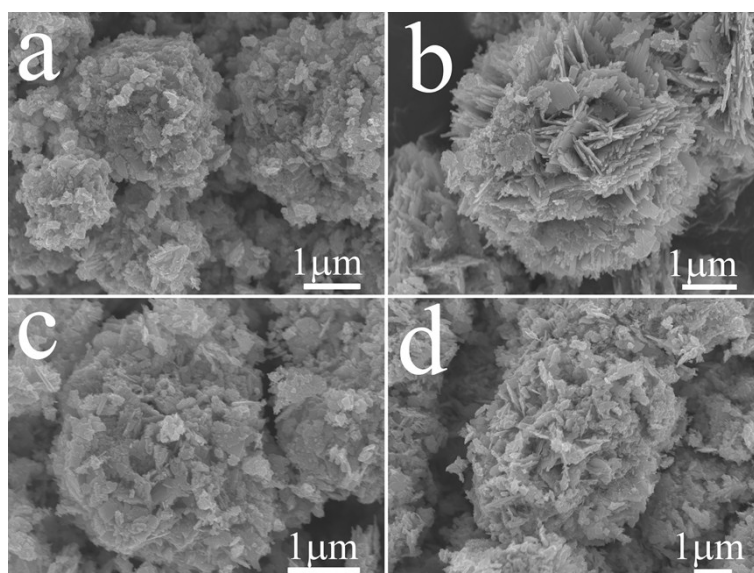

Fig. S2 Morphology controlling of the flower-like WO<sub>3</sub>: (a) 0.2 g PEG; (b) 0.4 g PEG; (c) 0.6 g PEG; (d) 0.8 g PEG.

Table S1 The gas sensing performance of WO<sub>3</sub> sensors to NO<sub>x</sub> gas

| Material                                              | Operating temperature | Sensitivity | Response time | Lowest detectable limit (ppm) | year     |
|-------------------------------------------------------|-----------------------|-------------|---------------|-------------------------------|----------|
| WO <sub>3</sub>                                       | Room temperature      | 80%         | 4.5 s         | 0.1 ppm                       | Our work |
| [1] WO <sub>3</sub> nanorods/graphene nanocomposites  | 300 °C                | 20200%      | ----          | 25 ppb                        | 2012     |
| [2] WO <sub>3</sub>                                   | 200 °C                | 16000%      | 2.4 min       | 20 ppb                        | 2015     |
| [3] hierarchically porous WO <sub>3</sub>             | 200 °C                | 90%         | 46 s          | ----                          | 2015     |
| [4] hierarchically WO <sub>3</sub> hollow nanospheres | 100 °C                | >80%        | 88 s          | 40 ppb                        | 2015     |
| [5] 3D WO <sub>3</sub> nanocolumn bundles             | 110 °C                | 2050%       | 23 s          | ----                          | 2015     |
| [6] WO <sub>3</sub> nanorods                          | 200 °C                | 20900%      | ----          | 5 ppm                         | 2012     |
| [7] WO <sub>3</sub> microspheres                      | 170 °C                | 15700%      | ----          | 10 ppm                        | 2014     |

S1. X. Q. An, J. C. Yu, Y. Wang, Y. M. Hu, X. L. Yu and G. J. Zhang, *J. Mater. Chem.*, 2012, **22**, 8525.

S2. Z. C. Meng, A. Fujii, T. Hashishin, N. Wada, T. Sanada, J. Tamaki, K. Kojima, H. Haneoka and T. Suzuki, *J. Mater. Chem. C*, 2015, **3**, 1134.

S3. X. X. Wang, K. Tian, H. Y. Li, Z. X. Cai and X. Guo, *RCS Adv.*, 2015, **5**, 29428.

S4. C. Wang, C. H. Feng, M. Wang, X. Li, P. F. Cheng, H. Zhang, Y. F. Sun, P. Sun and G. Y. Lu, *RCS Adv.*, 2015, **5**, 29698.

S5. J. J. Qi, S. Gao, K. Chen, J. Yang, H. W. Zhao, L. Guo and S. H. Yang, *J. Mater. Chem. A*, 2015, **3**, 18019.

S6. S. L. Bai, K. W. Zhang, R. X. Luo, D. Q. Li, A. F. Chen and C. C. Liu, *J. Mater. Chem.*, 2012, **22**, 12643.

S7. S. L. Bai, K. W. Zhang, L. S. Wang, J. H. Sun, R. X. Luo, D. Q. Li and A. F. Chen, *J. Mater. Chem. A*, 2014, **2**, 7927.
